# Supplementary material for: EEG Microstates and Functional Connectivity Abnormalities in Depressive Disorders: Diagnostic Potential and Machine Learning Application
Source: Research Square preprint supplement (doi:10.21203/rs.3.rs-6170701/v1), 2025-05-09
Supplement: Supplementary file 1 [file b57ade526ec4a63adb293ba5.docx]

**EEG Microstates and Functional Connectivity Abnormalities in Depressive Disorders: Diagnostic Potential and Machine Learning Application**

***Supplementary Information***

**Contents:**

Supplementary Materials and Methods

Supplemental Figures

Supplementary Tables

**Supplementary Materials and Methods**

The microstate analysis was conducted using the Microstates toolbox[1] integrated within the EEGLAB plugin[2] in MATLAB R2023a. The analysis followed these steps:

1. Data Preparation: Prior to performing microstate analysis, the preprocessed data underwent further processing, including segmentation removal, applying a 2-20 Hz band-pass filter, and re-referencing to the average across all electrodes.
2. Calculation of Global Field Power (GFP): For each participant, GFP was computed at each time point using the following formula:

1-1

where i represents each electrode, u represents the voltage at each electrode, and n is the number of electrodes. Since the local maxima of the GFP curve have the strongest signal strength and highest signal-to-noise ratio, the topographical maps at these points were selected for subsequent clustering analysis.

1. Clustering Analysis: A modified k-means algorithm (ignoring spatial polarity) was utilized to cluster the topographical maps, resulting in four distinct microstates (A-D) for each group.
2. Microstate Classification: The four group-level microstates served as template maps. Each participant's topographical maps at each time point were assigned to one of the four microstate classes (A-D) based on spatial similarity with these templates. The following microstate parameters were extracted for each participant: 1) Mean duration: The average duration of each microstate, measured in milliseconds; 2) Occurrence: The average number of times each microstate occurs per second; 3) Coverage: The proportion of the total EEG time occupied by each microstate; 4) Transition probability: The probability of transitioning from one microstate to another; 5) Topographic shape: The topographical configuration of each microstate.

**Reference**

[1] NAGABHUSHAN KALBURGI S, KLEINERT T, ARYAN D, et al. MICROSTATELAB: The EEGLAB Toolbox for Resting-State Microstate Analysis [J]. Brain Topogr, 2023.

[2] DELORME A, MAKEIG S. EEGLAB: an open source toolbox for analysis of single-trial EEG dynamics including independent component analysis [J]. J Neurosci Methods, 2004, 134(1): 9-21.


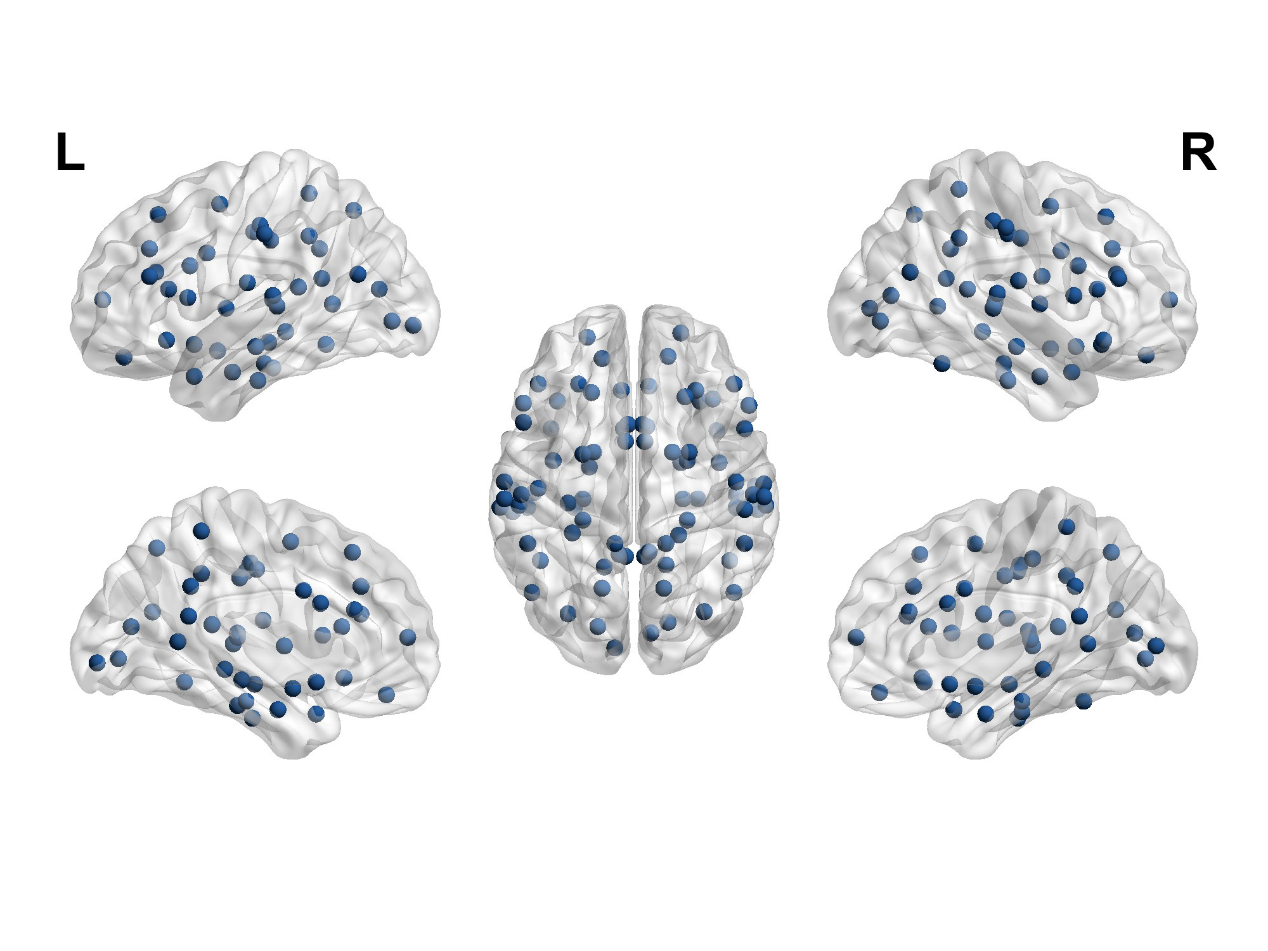


**Figure S1.** Spatial location of all ROIs

*Note.* ROC = region of interest; L= left; R = right.

**Table S1** Comparison of microstate between patients with DD and HCs

|  | HC group (n = 41) | DD group (n = 69) | *P* | *PFDR* |
| --- | --- | --- | --- | --- |
| Microstate A |  |  |  |  |
| Coverage | 0.22 (0.20-0.26) | 0.21 (0.16-0.25) | 0.140 | 0.305 |
| Mean duration | 75.40 (72.94-77.62) | 73.76 (69.34-78.34) | 0.270 | 0.373 |
| Occurrence | 3.02 (2.78-3.26) | 2.93 (2.36-3.19) | 0.093 | 0.305 |
| Transition probability |  |  |  |  |
| A to B | 0.33 (0.26-0.36) | 0.33 (0.29-0.36) | 0.427 | 0.488 |
| A to C | 0.34 (0.29-0.39) | 0.33 (0.28-0.38) | 0.241 | 0.373 |
| A to D | 0.35 (0.26-0.39) | 0.34 (0.29-0.39) | 0.597 | 0.623 |
| Microstate B |  |  |  |  |
| Coverage | 0.23 (0.19-0.26) | 0.25 (0.21-0.27) | 0.092 | 0.305 |
| Mean duration | 74.52 (70.77-80.31) | 78.30 (72.48-82.20) | 0.123 | 0.305 |
| Occurrence | 3.11 (2.53-3.26) | 3.13 (2.90-3.44) | 0.109 | 0.305 |
| Transition probability |  |  |  |  |
| B to A | 0.31 (0.28-0.36) | 0.30 (0.24-0.34) | 0.128 | 0.305 |
| B to C | 0.35 (0.31-0.39) | 0.32 (0.27-0.39) | 0.372 | 0.446 |
| B to D | 0.35 (0.28-0.38) | 0.37 (0.31-0.42) | 0.051 | 0.305 |
| Microstate C |  |  |  |  |
| Coverage | 0.27 (0.23-0.32) | 0.24 (0.20-0.29) | 0.075 | 0.305 |
| Mean duration | 80.99 (73.76-88.18) | 75.87 (71.26-83.34) | 0.017 | 0.204 |
| Occurrence | 3.37 (2.99-3.64) | 3.22 (2.81-3.51) | 0.183 | 0.314 |
| Transition probability |  |  |  |  |
| C to A | 0.30 (0.26-0.35) | 0.28 (0.25-0.33) | 0.131 | 0.305 |
| C to B | 0.31 (0.26-0.35) | 0.32 (0.29-0.38) | 0.181 | 0.314 |
| C to D | 0.39 (0.29-0.45) | 0.38 (0.33-0.42) | 0.914 | 0.914 |
| Microstate D |  |  |  |  |
| Coverage | 0.28 (0.20-0.33) | 0.28 (0.23-0.33) | 0.286 | 0.373 |
| Mean duration | 78.99 (72.20-89.69) | 81.67 (76.29-92.28) | 0.160 | 0.314 |
| Occurrence | 3.40 (2.81-3.63) | 3.42 (3.05-3.67) | 0.475 | 0.518 |
| Transition probability |  |  |  |  |
| D to A | 0.32 (0.27-0.35) | 0.31 (0.23-0.35) | 0.262 | 0.373 |
| D to B | 0.30 (0.26-0.34) | 0.34 (0.31-0.38) | 0.002 | 0.048 |
| D to C | 0.38 (0.31-0.44) | 0.35 (0.30-0.42) | 0.295 | 0.373 |

*Note.* EEG = electroencephalogram; DD = depressive disorder; HC = healthy control; FDR = false discovery rate.

**Table S2** The obtained classification performance with three different feature sets.

| Feature set | Classification performance | | | | Feature number |
| --- | --- | --- | --- | --- | --- |
| ACC | SEN | SPE | AUC |
| Set 1 | 0.667 | 0.923 | 0.250 | 0.625 | 1 |
| Set 2 | 0.762 | 1.000 | 0.375 | 0.827 | 290 |
| Set 3 | 0.810 | 0.923 | 0.625 | 0.837 | 390 |

*Note.* ACC = accuracy; SPE= specificity; SEN = sensitivity; AUC = area under the curve.
